# Supplementary material for: Parasite diversity in sea turtles of the temperate SW Atlantic: a bridge between systematics and ecology
Source: Research Square preprint supplement (doi:10.21203/rs.3.rs-4600556/v1), 2024-07-09
Supplement: Supplementary file 1 [file 9b20da438ff0ec618b6ac215.xlsx]

## Sheet: Table 1
	Species	RMU	Reference
	Digenea
	Adenogaster seriales	Mediterranean	Sey 1977
		Triple RMU	Santoro et al. 2010a
	Amphiorchys sp.	Northwest Atlantic	Cribb et al. 2017
	Angiostoma carettae	Northwest Atlantic	Manire et al. 2008; Bursey & Manire 2006
	Calycodes anthos	Northwest Atlantic	Greiner 2013
		Mediterranean	Sey 1977; Aznar et al. 1998; Manfredi et al. 1998; Valente et al. 2009; Gracan et al. 2012; Gentile et al. 2021
		Southwest Atlantic	Werneck et al. 2008
		Triple RMU	Santoro et al. 2010a
	Carettacola bipora	Northwest Atlantic	Manter & Larson 1950; Stacy et al. 2010; Greiner 2013
	Carettacola sp.	Northwest Atlantic	Jacobson et al. 2006
	Cricocephalus americanus		Linton 1910
	Cymatocarpus solearis	Northwest Atlantic	Linton 1910; Pratt 1914; Luhman 1935; Greiner 2013
		Mediterranean	Piccolo & Manfredi 2001; Marangi et al. 2020
		Southeast Indian	Blair & Limpus 1982
		Southwest Atlantic	Cavaco et al. 2021
		Triple RMU	Gentile et al. 2021
	Desmogonius loossi	Northeast Indian	Chattopadhyaya 1972
	Diaschistorchis ellipticus	Northwest Atlantic	Pratt 1914
	Diaschistorchis pandus	Northwest Atlantic	Greiner 2013
		Southwest Atlantic	Cavaco et al. 2021
		Mediterranean	Sey 1977
		Triple RMU	Karaa et al. 2019
	Echinocephalus sp.	Southeast Indian	Lester et al. 1980
	Elytrophallus carettae	South Pacific	Blair 1984
	Enodiotrema carettae	Southeast Indian	Blair & Limpus 1982
		Northwest Atlantic	Greiner 2013
	Enodiotrema megachondrus	Mediterranean	Aznar et al. 1998; Manfredi et al. 1998; Valente et al. 2009; Gracan et al. 2012; Marangi et al. 2020
		Southwest Atlantic	Werneck et al. 2019
		Triple RMU	Santoro et al. 2010a; Gentile et al. 2021
	Enodiotrema rectum	Mediterranean	Sey 1977
	Enodiotrema sp.	Mediterranean	Piccolo & Manfredi 2001
	Hapalotrema mistroides	Northwest Atlantic	Stacy et al. 2010; Greiner 2013
		Mediterranean	Looss 1899; Marchiori et al. 2017; Marangi et al. 2020
		Southeast Indian	Platt & Blair 1998
		Triple RMU	Monticelli 1896; Santoro et al. 2017, 2020
	Hapalotrema pambanensis	Northwest Atlantic	Stacy et al. 2010
	Hapalotrema sp.	Northwest Atlantic	Stacy et al. 2010
		Mediterranean	Gentile et al. 2021
	Hapalotrema synorchis	Northwest Atlantic	Luhman 1935
		Southeast Indian	Platt & Blair 1998
	Hemiuroidea sp.	Triple RMU	Aznar et al. 1998; Santoro et al. 2010a
	Hysterothylacium sp.	Mediterranean	Gracan et al. 2012
	Lophotaspis vallei	Northwest Atlantic	Luhman 1935; Greiner 2013
		Southwest Atlantic	Araujó 1941
	Metacetabulum yamagutii	Northeast Indian	Chattopadhyaya 1972
	Monticellius indicum	Southwest Atlantic	Werneck et al. 2017
	Neocaballerotrema caballeroi	Northeast Indian	Simha 1977
	Neospirorchis pricei	Northwest Atlantic	Manter & Larson 1950; Stacy et al. 2010; Greiner 2013
	Neospirorchis sp.	Northwest Atlantic	Jacobson et al. 2006; Stacy et al. 2010
		Mediterranean	Marchiori et al. 2017; Marangi et al. 2020; Santoro et al. 2020
		Triple RMU	Santoro et al. 2020
	Octangium sagitta	Mediterranean	Marangi et al. 2020
	Orchidasma amphiorchis	Northwest Atlantic	Linton 1910; Manter 1932; Luhman 1935; Greiner 2013
		Mediterranean	Sey 1977; Manfredi et al. 1998; Gracan et al. 2012; Gentile et al. 2021
		Southeast Indian	Blair & Limpus 1982
		Southwest Atlantic	Boero & Led 1974; Werneck et al. 2008; Present study
		Triple RMU	Santoro et al. 2010a; Gentile et al. 2021
		None (England)	Baylis 1928
	Orchidasma sp.	Mediterranean	Piccolo & Manfredi 2001
	Pachypsolus irroratus	Northwest Atlantic	Linton 1910; Greiner 2013
		Mediterranean	Manfredi et al. 1998; Gracan et al. 2012
		Southeast Indian	Blair & Limpus 1982
		Triple RMU	Euzet el at. 1972; Aznar et al. 1998; Santoro et al. 2010a
	Pachypsolus tertius	Northwest Atlantic	Linton 1910; Pratt 1914; Greiner 2013
	Plesiochorus cymbiformis	Northwest Atlantic	Pratt 1914; Cary 1930; Luhman 1935; Greiner 2013
		Mediterranean	Sey 1977; Manfredi et al. 1998; Marangi et al. 2020
		Southeast Indian	Blair & Limpus 1982
		Southwest Atlantic	Wermeck et al. 2018
		Triple RMU	Santoro et al. 2010a
	Plesiochorus elongatus	Southwest Atlantic	Werneck et al. 2019
	Pleurogonius longiusculus	Northeast Indian	Chattopadhyaya 1972
		Northwest Atlantic	Luhman 1935
		Southwest Atlantic	Ernst & Ernst 1977; Present study
	Pleurogonius trigonocephalus	Northwest Atlantic	Luhman 1935; Greiner 2013
		Mediterranean	Sey 1977; Manfredi et al. 1998; Piccolo & Manfredi 2001
		Southwest Atlantic	Viana 1924; Ernst & Ernst 1977
		Triple RMU	Santoro et al. 2010a
	Pronocephalus carettae	Northeast Indian	Chattopadhyaya 1972
	Pronocephalus mehrai
	Pronocephalus obliquus	Mediterranean	Gentile et al. 2021
		Southwest Atlantic	Viana 1924
	Pyelosomum chelonei	Northwest Atlantic	Greiner 2013
	Pyelosomum renicapite	Northwest Atlantic	Luhman 1935; Greiner 2013
		Southwest Atlantic	Werneck et al. 2008; Present study
		Triple RMU	Valente et al. 2009
	Rhadinorhynchus pristis	Triple RMU	Santoro et al. 2010a
	Rhytidodes gelatinosus	Northwest Atlantic	Luhman 1935; Greiner 2013
		Mediterranean	Euzet el at. 1972; Sey 1977; Blair & Limpus 1982; Aznar et al. 1998; Manfredi et al. 1998; Piccolo & Manfredi 2001; Valente et al. 2009; Gracan et al. 2012; Marangi et al. 2020; Gentile et al. 2021
		Southwest Atlantic	Viana 1924; Travassos et al. 1969; Cavaco et al. 2021
		Triple RMU	Santoro et al. 2010a; Gentile et al. 2021
	Rhytidodes secundus	Northwest Atlantic	Pratt 1914; Luhman 1935
	Shobanatrema shobanae	Northeast Indian	Simha & Chattopadhyaya 1978
	Spirorchidae	North Pacific	Kawazu et al. 2018
	Styphlodora solitaria	Northwest Atlantic	Luhman 1935; Greiner 2013
		Mediterranean	Looss 1899
	Styphlotrema solitaria	Mediterranean	Santoro et al. 2010a; Gentile et al. 2021
	Nematoda
	Anisakis pegreffii	Mediterranean	Santoro et al. 2010b
		Triple RMU	Santoro et al. 2010a
	Cucullanus carettae	Northwest Atlantic	Greiner 2013
		Mediterranean	De Renzo et al. 2021
		Southeast Indian	Lester et al. 1980
		Triple RMU	Santoro et al. 2010a
	Cucullanus sp.	Mediterranean	Piccolo & Manfredi 2001
	Kathlania leptura	Northwest Atlantic	Bursey et al. 2006; Greiner 2013
		Mediterranean	Sey 1977; Piccolo & Manfredi 2001
		Southeast Indian	Lester et al. 1980
		Southwest Atlantic	Werneck et al. 2008; Present study
		Triple RMU	Santoro et al. 2010a; Karaa et al. 2019
	Kathlania sp.	Mediterranean	Marangi et al. 2020; Gentile et al. 2021
	Sulcascaris sulcata	Northwest Atlantic	Greiner 2013
		Mediterranean	Sey 1977; Manfredi et al. 1998; Piccolo & Manfredi 2001; Gracan et al. 2012; Marangi et al. 2020; Marcer et al. 2020; Gentile et al. 2021
		Southeast Indian	Lester et al. 1980
		Southwest Atlantic	Lent & Freitas 1948; Werneck et al. 2008; Present study
		Triple RMU	Santoro et al. 2010a, 2019; Gentile et al. 2021
	Tonaudia tonaudia	Northwest Atlantic	Bursey et al. 2006
		Mediterranean	Inglis 1957
	Cestoda
	Trypanorhynch cysts	Northwest Atlantic	Greiner 2013
		Mediterranean	Sey 1977
	Hirudinea
	Ozobranchus margoi	Northwest Atlantic	Davies 1974
		Mediterranean	Piccolo & Manfredi 2001; Sterioti et al. 2017
		Southwest Atlantic	Rodenbusch et al. 2012; Present study
